# Supplementary material
Source: Royal Society of Chemistry journal article supplement (doi:10.1039/d6ay00133e)
Supplement: d6ay00133e1.pdf [file d6ay00133e1.pdf]

*Supporting Information for*

# **Multidimensional information detection of liver cancer cell exosomes treated with Shikonin**

Jian Qiao <sup>a,b</sup>, Jingran Zhang <sup>a,b\*</sup>, Chunli Qin <sup>a,b</sup>, Changji Mu <sup>a,b,f</sup>, TuoYu Ju  
<sup>a,b</sup>, Liguo Tian <sup>a,b</sup>, Yuanting Yang <sup>c</sup>, Yang Liu <sup>d</sup>, Yanquan Geng <sup>e</sup>

*<sup>a</sup> Ministry of Education Key Laboratory for Cross-Scale Micro and Nano  
Manufacturing, Changchun University of Science and Technology, Changchun  
130022, P. R. China.*

*<sup>b</sup> International Research Centre for Nano Handling and Manufacturing of China,  
Changchun University of Science and Technology, Changchun 130022, P. R. China.*

*<sup>c</sup> Jilin Province Product Quality Supervision and Inspection Institute, Changchun  
130103, P. R. China.*

*<sup>d</sup> Changchun Sci-Tech University, Changchun 130600, P. R. China.*

*<sup>e</sup> Center for Precision Engineering, Harbin Institute of Technology, Harbin,  
Heilongjiang 150001, P. R. China.*

*<sup>f</sup> Changchun Institute of Optics, Fine Mechanics and Physics, Chinese Academy of  
Sciences, Changchun 130033, PR China*

*\* Corresponding author. Tel.: +86-0431-85582420. Fax: +86-0431-85582420*

*Email address: zhangjingran@cust.edu.cn (J. R. Zhang)*

---

## **S1. Experimental and method**

### S1.1 Cells and Reagents

The human hepatoma cell line SMMC-7721 cells, HepG2 cells and human cell line HL-7702 cells were purchased from the Cell Bank (Shanghai, China). SMMC-7721 cells, HepG2 cells and HL-7702 cells were cultured under standard culture conditions with 37°C and 5% carbon dioxide. The SMMC-7721 cells, HepG2 cells and HL-7702 cells were incubated in the RPMI-1640 medium (GIBCO, USA) with 10% FBS and 1% penicillin/streptomycin (Invitrogen). The Phosphate Buffered Saline (PBS) was used to rinse the petri dishes two or three times after removing the supernatant when the cells grew to 80% in the petri dishes. Then, the RPMI-1640 medium containing 10% exocrine serum was added to the petri dishes to remove the effect of exosomes contained in FBS. The supernatants of SMMC-7721 cells, HepG2 cells and HL-7702 cells were collected respectively after 48 hours.

### S1.2 Exosomes extracted by ultrafiltration

The supernatants of SMMC-7721 cells, HepG2 cells and HL-7702 cells were collected, respectively, and subjected to differential centrifugation: 2000 g for 10 min and then 10 000 g for 15 min to remove the cell debris. The supernatant obtained by centrifugation was filtered with 0.22 µm filters (Millipore) and then added into Amicon®ultra-15 ultrafiltration tubes (Aperture: 100 kDa), centrifuged at 4000 g for 30 min, and emptied into collection tubes. Finally, PBS was added as a replacement. The sample was gently aspirated several times and centrifuged at 4000 g for 0.5 h. The treated SMMC-7721-exos, HepG2-exos, and HL-7702-exos were aspirated from the

---

concentration tubes, subsequently resuspended in PBS, and aliquoted for further use. The SMMC-7721-exos, HepG2-exos and HL-7702-exos could be immediately used for subsequent experiments or stored at -80 °C.

### S1.3 Scanning Electron Microscope (SEM)

The morphologies of exosomes and cells were investigated by SEM. Briefly, 1 µl of exosomes was diluted 1000 times with PBS. A drop of 10 µl was put on the mica surface and dried at 25 °C. About  $1 \times 10^4$  cells were plated onto coverslips. The cells were rinsed with PBS after 24 h, followed by fixation with 2.5% glutaraldehyde for further 12 h at 4 °C. Later, the coverslips were rewashed with PBS, followed by graded ethanol. The specimens were then coated with Au (5 nm) before SEM observation (FEI Quanta 250 FEG).

### S1.4 Western blotting (WB)

Purified SMMC-7721-exos, HepG2-exos and HL-7702-exos used for WB were extracted with RIPA buffer (high) (Solarbio, China) containing protein phosphatase inhibitors (Solarbio, China). The proteins were quantified using the BCA™ Protein Assay (Solarbio, China). 10% SDS-PAGE was employed to separate the protein lysate, which was then electrophoretically transferred to a nitrocellulose (NC) membrane. A 5% skimmed milk powder solution was used to seal the NC membrane. The primary antibodies of CD9 and TSG101 were incubated with the membrane at 4 °C overnight. The secondary antibodies were added and incubated after washing. Finally, the ECL luminescent solution (Millipore) was dripped evenly on the imprinted membrane and incubated at 25 °C for 1-2 min. The Chemoluminescence Imaging System (Analytik

---

Jena, Germany) was used to capture the chemiluminescence signal and analyze the intensity quantitatively. Each assay was repeated thrice. A representative image of three independent experiments was shown. Another group of WB results of SMMC-7721-exos, HepG2-exos, and HL-7702-exos was shown in Fig.S1. WB results of Calnexin as a negative marker were shown in Fig.S2.

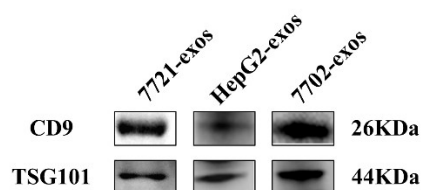

Fig. S1 Another group of WB results of SMMC-7721-exos, HepG2-exos, and HL-7702-exos.

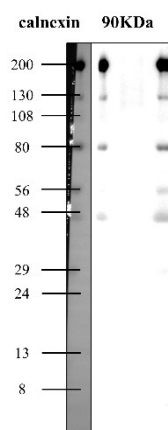

Fig. S2 WB results of Calnexin as a negative marker.

### S1.5 Nanoparticle Tracking Analysis (NTA)

The size distribution and particle concentration of purified exosomes were analyzed using a PMX120 system (PARTICLE METRIX, Germany) equipped with particle-tracking software and a red (642 nm) laser. Briefly, exosomes isolated from each cell line were diluted by 100- to 1000-fold with PBS to the appropriate concentration for the analysis, a range from 1 to  $10 \times 10^8$  particles/ml. All acquisition settings, including capture time, camera level, and detection threshold, were kept the

---

same in all samples to minimize variability. For each sample, the measurements were performed in triplicate under identical analysis settings.
